# Supplementary material for: The Mining of Genetic Loci and the Analysis of Candidate Genes to Identify the Physical and Chemical Markers of Anti-Senescence in Rice
Source: MDPI journal article supplement (doi:10.3390/plants12223812), 2023-11-09
Supplement: s1 [file s1]

**SUPPLEMENTARY MATERIALS FIGURE METHOD TABLE**

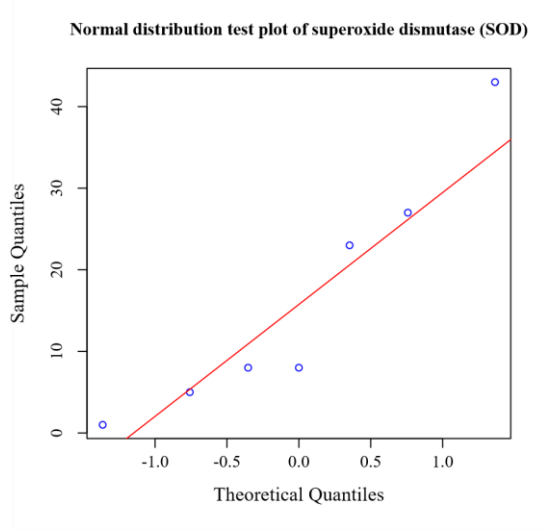

**Figure S1.** Normal distribution test plot of superoxide dismutase (SOD)

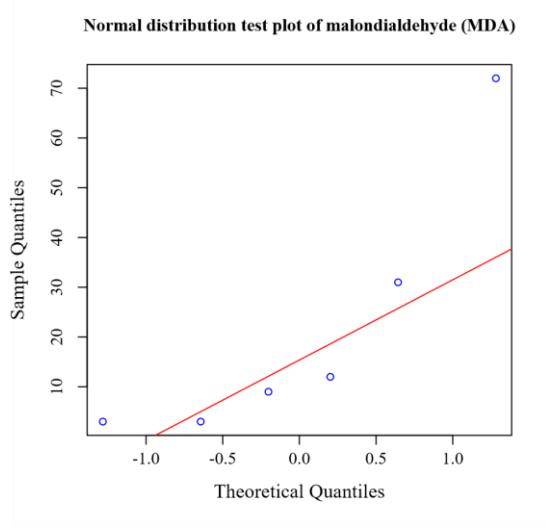

**Figure S2.** Normal distribution test plot of malondialdehyde (MDA)

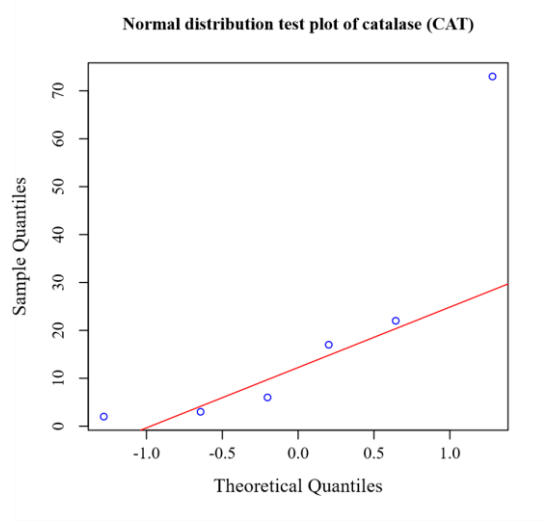

**Figure S3.** Normal distribution test plot of catalase (CAT)

**Method S1.** Methods for the determination of superoxide dismutase (SOD)

## 1. Reagent composition and preparation:

|                                                                                                                                                                                                              | Composition of reagents    | A001-3-1: 48T  | A001-3-2: 96T  | Preservation             |
|--------------------------------------------------------------------------------------------------------------------------------------------------------------------------------------------------------------|----------------------------|----------------|----------------|--------------------------|
| Reagent 1                                                                                                                                                                                                    | Buffer solution            | 15 mL/bottle   | 30 mL/bottle   | 2~8°C for 6 months       |
| Reagent 2                                                                                                                                                                                                    | Substrate storage solution | 0.07 mL/branch | 0.15 mL/branch | 2~8°C for 6 months       |
| Preparation of substrate application solution: substrate storage solution : Buffer solution was mixed at a ratio of 1:200 to form substrate application solution, which was prepared immediately for use.    |                            |                |                |                          |
| Reagent 3                                                                                                                                                                                                    | Enzyme storage solution    | 0.15 mL/branch | 0.30 mL/branch | Below -20°C for 6 months |
| Reagent 4                                                                                                                                                                                                    | Enzyme diluent             | 2 mL/bottle    | 4 mL/bottle    | 2~8°C for 6 months       |
| Preparation of the enzyme working solution: enzyme storage solution : the enzyme dilution solution was mixed at a ratio of 1:10 to make the enzyme working solution, which was prepared immediately for use. |                            |                |                |                          |

2. Sample pretreatment: Take an appropriate amount of rice leaves with clean surface and no dirt in a mortar, add an appropriate amount of liquid nitrogen, quickly grind them into powder, and weigh the powder without leaves. According to the ratio of weight (g) : volume (mL)=1:9, 9 times the volume of phosphate buffer solution (0.1 mol/L pH=7~7.4) was added, vortexed and mixed for 3 minutes, then centrifuged at 4000 rpm 4°C for 10 minutes, and the supernatant (10% of the supernatant homogenate sample to be tested) was taken.

Note: The supernatant after centrifugation of plant tissue homogenate should be as clear and transparent as possible, and the centrifugation speed and time can be increased according to the actual situation.

## 3. Sample addition was determined according to the table below:

|                                                                                                               | Control hole | Control blank hole | Determination hole | Determination blank hole |
|---------------------------------------------------------------------------------------------------------------|--------------|--------------------|--------------------|--------------------------|
| Sample to be tested/ $\mu$ L                                                                                  | -            | -                  | 20                 | 20                       |
| Distilled water/ $\mu$ L                                                                                      | 20           | 20                 | -                  | -                        |
| Enzyme working solution/ $\mu$ L                                                                              | 20           | 20                 | 20                 | -                        |
| Enzyme diluent/ $\mu$ L                                                                                       | -            | 20                 | -                  | 20                       |
| Substrate application solution/ $\mu$ L                                                                       | 200          | 200                | 200                | 200                      |
| The mixture was mixed and incubated at 37°C for 20 min, followed by reading on a microplate reader at 450 nm. |              |                    |                    |                          |

## 4. Formula of calculation:

$$1) \text{ SOD inhibition rate (\%)} = \frac{(A_{\text{control}} - A_{\text{control blank}}) - (A_{\text{determination}} - A_{\text{determination blank}})}{(A_{\text{control}} - A_{\text{control blank}})} \times 100\%$$

$$2) \text{ SOD activity (U/g tissue)} = \text{SOD inhibition rate} \div 50\% \times \frac{\text{system of reaction}}{\text{multiple of dilution}} \left( \frac{0.24 \text{ mL}}{0.02 \text{ mL}} \right) \times$$

$$\text{dilutions before testing} \div \frac{\text{weight of tissue (g)}}{\text{the added homogenization buffer (mL)}}$$

**Method S2.** Methods for the determination of malondialdehyde (MDA)

### 1. Reagent composition and preparation:

|                                                                                                                                                                   | Composition of reagents          | Reagent specification | Preservation                                 |
|-------------------------------------------------------------------------------------------------------------------------------------------------------------------|----------------------------------|-----------------------|----------------------------------------------|
| Reagent 1                                                                                                                                                         | Clarifying agent                 | 3 mL/bottle           | Store at room temperature for one year       |
| The reagent will solidify when it is cold during the day. Before each test, heat the water bath at 37°C to accelerate the dissolution until it is clear.          |                                  |                       |                                              |
| Reagent 2                                                                                                                                                         | Buffer agent                     | 45 mL/bottle          | Refrigerate at 4 °C for one year             |
| Reagent 3                                                                                                                                                         | Color development agent          | 15 mL/bottle          | Refrigerate at 4 °C in the dark for one year |
| Working solution preparation: reagent 1: reagent 2: reagent 3 = 0.1:3:1 ratio for preparation, which was prepared immediately for use.                            |                                  |                       |                                              |
| Reagent 4                                                                                                                                                         | 10 nmol/mL standard material     | 1 mL/bottle           | Seal and refrigerate at 4 °C for one year    |
| Reagent 5                                                                                                                                                         | Concentrate the extract 10 times | 20 mL/bottle          | Seal and refrigerate at 4 °C for one year    |
| Reagent 5 preparation of the application extract: The ratio of 10 times concentrated extract: distilled water = 1:9 was prepared to form the application extract. |                                  |                       |                                              |

2. Sample pretreatment: The plant tissue was weighed accurately, and 9 times the volume of reagent solution was added according to the weight/volume ratio of 1:9. After being cut into pieces, the homogenate was homogenized under an ice bath at 10000 rpm, each time lasting 10-15 seconds, intermittent 30 seconds, a total of 5 times. Then the homogenate was sucked into a centrifuge tube, centrifuged at 4000 rpm for 10 minutes, and the supernatant was taken for testing.

3. Sample addition was determined according to the table below:

|                                 | Blank tube | Standard tube | Determination tube |
|---------------------------------|------------|---------------|--------------------|
| Absolute ethanol/μL             | 50         | -             | -                  |
| 10 nmol/mL standard material/μL | -          | 50            | -                  |
| Sample to be tested/μL          | -          | -             | 50                 |
| Working fluid/μL                | 1000       | 1000          | 1000               |

Cover the centrifuge tube (cover with a small hole with a needle), mix with vortex mixer, water bath above 95°C for 20 minutes, take it out and cool with running water, the wavelength is 530 nm, the microplate empty plate is read, 0.25 mL of each tube reaction liquid is accurately sucked into the 96-hole microplate, the microplate reader is used to measure the absorbance of each hole (the reading of the empty plate is subtracted from the calculation).

### 4. Formula of calculation:

$$\text{Content of MDA (nmol/g)} = \frac{A_{\text{determination}} - A_{\text{blank}}}{A_{\text{standard}} - A_{\text{blank}}} \times C_{\text{standard}} \div \frac{W}{V_{\text{extraction}}}$$

Note:  $C_{\text{standard}}$ : concentration of standard, 10 nmol/mL

W: weight of plant tissue/g

$V_{\text{extraction}}$ : the total amount of the extract/mL

### Method S3. Methods for the determination of total protein (Cpr)

1. Reagent composition and preparation:

|                                                                                                                                                                                                                     | Composition of reagents                 | Reagent specification | Preservation                |
|---------------------------------------------------------------------------------------------------------------------------------------------------------------------------------------------------------------------|-----------------------------------------|-----------------------|-----------------------------|
| Reagent 1                                                                                                                                                                                                           | Coomassie brilliant blue stock solution | 60 mL/bottle          | Store at 4°C for six months |
| Preparation of Coomassie brilliant blue chromogenic solution: according to the ratio of Coomassie brilliant blue storage solution: distilled water =1:4 (5 times dilution), which was prepared immediately for use. |                                         |                       |                             |
| Reagent 2                                                                                                                                                                                                           | Protein standard solution               | 0.5 mL/branch         | Store at 4°C for one month  |
| If you want to prolong the storage time of reagent 2 (concentration see label), please divide the standard solution and freeze it at -20°C for 6 months.                                                            |                                         |                       |                             |

2. Sample pretreatment: The weight of the tissue to be tested was accurately weighed, and 9 times the volume of 0.9% saline was added according to the ratio of weight (g) : volume (mL) = 1:9, homogenized under an ice bath, centrifuged at 2500 rpm for 10 minutes, and the supernatant (10% homogenate) was taken to be measured.

3. Sample addition was determined according to the table below:

|                                                                                                                                                                         | Blank tube | Standard tube | Determination tube |
|-------------------------------------------------------------------------------------------------------------------------------------------------------------------------|------------|---------------|--------------------|
| Distilled water/mL                                                                                                                                                      | 0.05       | -             | -                  |
| Protein standard solution/mL                                                                                                                                            | -          | 0.05          | -                  |
| Sample/mL                                                                                                                                                               | -          | -             | 0.05               |
| Coomassie brilliant blue chromogenic solution/mL                                                                                                                        | 3.0        | 3.0           | 3.0                |
| The mixture was mixed and allowed to stand for 10 minutes at 595 nm, 1 cm optical diameter, and distilled water was zeroed, and the OD value of each tube was measured. |            |               |                    |

4. Formula of calculation:

$$\text{Protein of the sample to be tested (g/L)} = \frac{A_{\text{determination}} - A_{\text{blank}}}{A_{\text{standard}} - A_{\text{blank}}} \times C_{\text{standard}} \times N$$

Note: N represents the dilution of the sample before testing.

**Method S4.** Methods for the determination of catalase (CAT)

1. Reagent composition and preparation:

|                                                                                                                   | Composition of reagents | Reagent specification | Preservation |
|-------------------------------------------------------------------------------------------------------------------|-------------------------|-----------------------|--------------|
| Reagent 1                                                                                                         | Liquid                  | 100 mL/               | Store at 4°C |
| Reagent 2                                                                                                         | Liquid of substrate     | 10 mL/bottle          | Store at 4°C |
| Reagent 3                                                                                                         | Color developing powder | a bottle              | Store at 4°C |
| Reagent 3 was dissolved by adding 100 mL of distilled water before use.                                           |                         |                       |              |
| Reagent 4                                                                                                         | Liquid                  | 10 mL/bottle          | Store at 4°C |
| The reagent 4 will solidify when it is cold, and it can be used by heating it to transparency at 37°C before use. |                         |                       |              |

2. Sample pretreatment: The tissue was weighed accurately, and 9 times the volume of normal saline was added according to the ratio of weight (g) : volume (mL) = 1:9. Under the condition of

ice water bath, 10% tissue homogenate was prepared, centrifuged at 2500 rpm for 10 minutes, the supernatant was taken, and then diluted with normal saline to obtain the optimal sampling concentration.

3. Sample addition was determined according to the table below:

|                                                                                                                                                                                                                                                                               | Blank tube | Determination tube |
|-------------------------------------------------------------------------------------------------------------------------------------------------------------------------------------------------------------------------------------------------------------------------------|------------|--------------------|
| Tissue homogenate/mL                                                                                                                                                                                                                                                          | -          | 0.05               |
| Reagent 1/mL (preheat at 37°C)                                                                                                                                                                                                                                                | 1.0        | 1.0                |
| Reagent 2/mL (preheat at 37°C)                                                                                                                                                                                                                                                | 0.1        | 0.1                |
| The mixture was immediately mixed and timed, and the reaction was accurate for 1 min (60 seconds) at 37°C                                                                                                                                                                     |            |                    |
| Reagent 3/mL                                                                                                                                                                                                                                                                  | 1.0        | 1.0                |
| Reagent 4/mL                                                                                                                                                                                                                                                                  | 0.1        | 0.1                |
| Tissue homogenate/mL                                                                                                                                                                                                                                                          | 0.05       | -                  |
| The mixture was mixed, the wavelength was 405 nm, the optical diameter was 0.5 cm, and the distilled water was zeroed. The absorbance value of each tube was measured and calculated<br>$\Delta A_{\text{Tissue homogenate}} = A_{\text{control}} - A_{\text{determination}}$ |            |                    |

4. Formula of calculation:

$$\text{CAT activity in tissues (U/mgprot)} = \Delta A \times 271 \div V_{\text{sample}} \div T \div \text{Cpr}$$

Note: 271 is the inverse of the slope, constant, and is used directly

$V_{\text{sample}}$ : amount, 0.05 mL

Cpr: protein concentration in the homogenate, mgprot/mL (prot refers to protein)

**Table S1.** Anti-senescence candidate gene primers used for qRT-PCR

| QTL            | Gene ID               | Forward primer (5'→3') | Downstream primer (5'→3') |
|----------------|-----------------------|------------------------|---------------------------|
|                | <i>OsActin</i>        | TGGCATCTCAGCACATTCC    | TGCACAATGGATGGGTCCAGA     |
| <i>qCAT1</i>   | <i>LOC_Os01g61500</i> | AACTGGCGTAGAGCCTGAAA   | ACAGCCTCACAAGCCTTCAT      |
|                | <i>LOC_Os01g61810</i> | ACAGCCTCACAAGCCTTCAT   | ACTCCTCAAAGCCAAGCGTA      |
| <i>qMDA4</i>   | <i>LOC_Os04g40130</i> | AGGATGCTCTGAGGATTCGG   | ACGCTCGTCTTCAGTGGTAA      |
| <i>qSOD8</i>   | <i>LOC_Os08g37760</i> | GTCATTGCCTCGCTGGTC     | GCCGGATGTAGATCGAGAAG      |
|                | <i>LOC_Os09g16920</i> | TTCTACCCGGTCATGTGCTT   | CTGAACATGCTGAATCCCGG      |
| <i>qMDA9.2</i> | <i>LOC_Os09g16950</i> | CATGGTTGGTGTGATAGCCG   | TGGTGTGTGACGACGAGTCA      |
|                | <i>LOC_Os09g17010</i> | GCCATCCTAGAGCTCCACAT   | ATTCGCCGGTTTGTATGACC      |
| <i>qMDA11</i>  | <i>LOC_Os11g40690</i> | CACTGCTCGAAATGTGTCTGT  | AATGACGCCAAGTGACTTCC      |
| <i>qSOD12</i>  | <i>LOC_Os11g40750</i> | CCTGAGGATCCACTTTTCCA   | TCGAAGCTGACACACTTTGG      |
|                | <i>LOC_Os12g35330</i> | TGGACCGTGTGATGAAGCTA   | AGCTTCCCACCAATGAACAC      |
